# 1    **Loss of microbial diversity and pathogen domination** 2    **of the gut microbiota in critically ill patients**

3    **Authors:** Anuradha Ravi<sup>1</sup>, Fenella D Halstead<sup>2,3</sup>, Amy Bamford<sup>2,3</sup>, Anna Casey<sup>2,3</sup>, Nicholas M.  
4    Thomson<sup>1</sup>, Willem van Schaik<sup>4</sup>, Catherine Snelson<sup>3</sup>, Robert Goulden<sup>5</sup>, Ebenezer Foster-Nyarko<sup>1</sup>,  
5    George M. Savva<sup>1</sup>, Tony Whitehouse<sup>3,6</sup>, Mark J. Pallen\*<sup>1,6</sup>, Beryl A. Oppenheim<sup>2,3,6</sup>

## 6    **Affiliations:**

7    <sup>1</sup>Quadram Institute Bioscience and University of East Anglia, Norwich, NR4 7UA, United  
8    Kingdom

9    <sup>2</sup>NIHR Surgical Reconstruction and Microbiology Research Centre, Queen Elizabeth Hospital,  
10    Birmingham, B15 2GW, United Kingdom

11    <sup>3</sup>Queen Elizabeth Hospital, University Hospitals Birmingham NHS Foundation Trust,  
12    Birmingham, B15 2GW, United Kingdom

13    <sup>4</sup>Institute of Microbiology and Infection, University of Birmingham, Edgbaston, Birmingham  
14    B15 2TT, United Kingdom

15    <sup>5</sup>McGill University, Montréal, QC H3G 2M1, Canada

16    <sup>6</sup>These authors contributed equally.

17    \*email: [mark.pallen@quadram.ac.uk](mailto:mark.pallen@quadram.ac.uk)

18

19

20

## 21 **Abstract**

22

## 23 **Background**

24 For long-stay patients on the adult intensive care unit, the gut microbiota plays a key role in  
25 determining the balance between health and disease. However, it remains unclear which ICU  
26 patients might benefit from interventions targeting the gut microbiota or the pathogens therein.

27

## 28 **Methods**

29 We undertook a prospective observational study of twenty-four ICU patients, in which serial  
30 faecal samples were subjected to shotgun metagenomic sequencing, phylogenetic profiling and  
31 microbial genome analyses.

32

## 33 **Results**

34 Two-thirds of patients experienced a marked drop in gut microbial diversity (to an inverse  
35 Simpson's index of  $<4$ ) at some stage during their stay in ICU, often accompanied by absence or  
36 loss of beneficial commensal bacteria. Intravenous administration of the broad-spectrum  
37 antimicrobial agent meropenem was significantly associated with loss of gut microbial diversity,  
38 but administration of other antibiotics, including piperacillin-tazobactam, failed to trigger  
39 statistically detectable changes in microbial diversity. In three quarters of ICU patients, we  
40 documented episodes of gut domination by pathogenic strains, with evidence of cryptic

41 nosocomial transmission of *Enterococcus faecium*. In some patients we also saw domination of  
42 the gut microbiota by commensal organisms, such as *Methanobrevibacter smithii*.

43

## 44 **Conclusions**

45 Our results support a role for metagenomic surveillance of the gut microbiota and pave the way  
46 for patient-specific interventions that maintain or restore gut microbial diversity in the ICU.

47

## 48 **Key Words**

49 Intensive care unit; microbiome; gut microbiota; pathogens; shotgun metagenomics;  
50 antimicrobial resistance; critical illness; meropenem

51

## 52 **Background**

53 For long-stay patients on the adult intensive care unit (ICU), as in other settings, the microbial  
54 community of the gut—the gut microbiota—plays a key role in determining the balance between  
55 health and disease [1–3]. Unfortunately, many life-saving measures applied to ICU patients can  
56 have negative impacts on the gut microbiota—examples include assisted ventilation, enteric  
57 feeds and a range of medications, including broad-spectrum antibiotics, proton-pump inhibitors,  
58 inotropes and opioids [4–6]. In recent years, interest has grown in protecting or restoring the  
59 integrity of the gut microbiome in ICU patients, using ecological approaches such as probiotics  
60 or faecal microbiota transplants [7–18]. Similarly, surveillance of pathogens and of antimicrobial  
61 resistance in the gut of critically ill patients has potential benefit in predicting infection and  
62 guiding treatment or infection control measures [19–21]. However, in the absence of high-

63 precision approaches to the surveillance of complex microbial communities, it remains unclear  
64 which ICU patients might benefit from interventions affecting the gut microbiota and how such  
65 interventions should be targeted for optimum effect.

66 Fortunately, recent advances in sequencing and bioinformatics have made shotgun  
67 metagenomics an attractive approach in precision medicine [22, 23]. We therefore undertook a  
68 prospective observational study of twenty-four ICU patients, in which serial faecal samples were  
69 subjected to shotgun metagenomic sequencing, phylogenetic profiling and microbial genome  
70 analyses, with the aims of evaluating the utility of shotgun metagenomics in long-stay ICU  
71 patients, documenting the dynamics of the gut microbiota in this context and determining how it  
72 is affected by relevant clinical and demographic factors.

73

## 74 **Methods**

75

### 76 **Study design and human subjects**

77 Queen Elizabeth Hospital Birmingham is a university teaching hospital serving a population of  
78 approximately 1.5 million with a wide range of tertiary services including solid organ and bone  
79 marrow transplantation. Patients were enrolled for study participation if they were aged over 18  
80 years, had been admitted to the ICU within the last 72 hours and were expected to remain there  
81 for more than 48 hours. Patients were considered evaluable if their first stool sample and at least  
82 one subsequent sample were collected on the ICU.

83 Patient information was collected on a case report form, which included information on  
84 gender, age, reason for admission, severity of disease scores, length of hospital stay prior to ICU

85 admission, current and previous antibiotic therapy, blood markers, details of nutrition, drugs and  
86 relevant clinical microbiology results. The study started in May 2017 and ended in February  
87 2018, when data and specimen collection for the thirtieth participant had been completed.

88

## 89 **Sample collection, storage and DNA extraction**

90 The first faecal sample passed each calendar day by each enrolled patient on the ICU was  
91 collected and sent to the research team. Stool samples were aliquotted and then frozen at -20°C  
92 as soon as possible after collection. They were then shipped frozen to the Quadram Institute in  
93 Norwich, where they were stored at -80°C. Faecal samples were destroyed at the end of the  
94 study. Around 0.1 to 0.2 mg of frozen faecal sample was used for DNA extraction. The  
95 extraction was carried out using FastDNA Spin kit for Soil (MP Biomedicals, California, USA)  
96 according to the manufacturer's instructions, except that 100 µl rather than 50 µl of DES elution  
97 buffer was used in the final elution.

98 Samples from extra-intestinal sites were collected when indicated on clinical grounds and  
99 processed by the hospital's clinical microbiology laboratory using standard diagnostic  
100 procedures.

101

## 102 **Shotgun metagenomic sequencing**

103 The DNA concentration was normalised using Qubit 4 (Invitrogen, Thermo Fisher, MA, USA)  
104 and sequencing libraries were prepared using the Nextera XT kit (Illumina). The DNA  
105 fragmented, tagged, cleaned and normalized according to the manufacturer's recommendations.  
106 The quality of final pooled library was evaluated using Agilent 2200 Tape Station (Agilent) and

107 the concentration was measured using Qubit 4 (Invitrogen, Thermo Scientific, MA, USA).  
108 Libraries were sequenced in batches on a NextSeq 550 using a high-output flow cell delivering  
109 150-bp paired-end reads. The libraries were sequenced to a sequencing depth of ~ 2 Gbp/  
110 sample.

111 Reads from the sequencer were uploaded on to virtual machines provided by the MRC  
112 CLIMB (Cloud Infrastructure for Microbial Bioinformatics) project using BaseMount [24, 25].  
113 Initially, the sequences were assessed for quality using FastQC (version 0.11.5) and SeqKit with  
114 the parameter ‘stats’ [26, 27]. Quality filtering was performed using Trimmomatic (version 0.35)  
115 with default parameters [28]. Trimmomatic’s Illuminaclip function was used to remove Illumina  
116 adapters. Human sequences were removed by mapping reads towards human genome, Hg19  
117 using BowTie2 version 2.3.4.1 [46] for mapping and SAMtools [29] to view with parameters -f  
118 12 -F 256 to extract unmapped sequences and BEDtools bamtofastq to convert BAM to FASTQ  
119 files. [30]. Then, these sequences were deposited in the Sequence Read Archive under reference  
120 SUB5204757.

121

## 122 **Taxonomic profiling and statistical analysis**

123 Forward and reverse paired reads were merged for each sample and fed as input to MetaPhlan2  
124 v2.7.7, which was used for taxonomic assignment of reads in each sample [31]. Metaphlan2  
125 output was merged using the python script merge\_metaphlan\_tables.py. A species-only  
126 abundance table was created using Text Wrangler v5.5.2. Species that occurred only once and  
127 species with a relative abundance below 1% in the whole dataset were discarded. This abundance  
128 data table (Additional File 1) was used for diversity analyses.

129 Alpha diversity was assessed using the inverse Simpsons index calculated from the  
130 MetaPhlan2 output using the vegan package (version 2.5-4) in R (version 3.5.2) [32]. Linear  
131 mixed models were used to estimate the fixed effects on alpha diversity of time since ICU  
132 admission, antibiotic use, time to sample storage and health status measures by SOFA score, and  
133 age and sex of the patient. The *nlme* package (version 3.1-137) in R (version 3.5.2) was used to  
134 estimate all models [32, 33].

135 Use of meropenem and piperacillin-tazobactam was coded individually because of their  
136 clinical importance and high use in our dataset, while all other antimicrobials were grouped  
137 together in a single variable ‘other antimicrobials’ for the final multivariable analysis. To  
138 account for long-term effects of antibiotics on microbial diversity and absence of data on when  
139 antibiotics were started, antibiotic use variables were coded at each sampling point into one of  
140 four levels: no use, starting use, ongoing use and historic use. Episodes were classified as  
141 ‘starting’ if the antibiotic was started on same day the sample was taken; ‘ongoing’ if the  
142 antibiotic was still being administered on the day of a sample being taken; ‘historic’ if the  
143 antibiotic had been used prior to the date of sample collection but was no longer being  
144 administered. Data from 228 samples was included in the final analysis, with nine samples  
145 excluded because the SOFA score was missing. This dataset included 42 samples taken while  
146 meropenem was administered and 44 while piperacillin-tazobactam was administered. Complete-  
147 case analysis was used in the case of missing data. Random patient-level effects on intercept and  
148 slope (linear change in diversity over time) were included. An auto-regressive correlation  
149 structure (AR1) in discrete time was used to account for the residual autocorrelation evident from  
150 initial mixed models. Residual autocorrelation in the final model was minimal.

151

## 152 **Metagenome-assembled genomes**

153 For metagenomic binning, reads from each patient was co-assembled into contigs using  
154 MEGAHIT v1.1.3. [34]. Next, anvi'o version 5.1 was used for mapping, binning, refining and  
155 visualising the bins. [35]. In brief, 'anvi-gen-contigs-database' was used with default settings to  
156 profile the contigs using Prodigal v2.6.3 and identify open reading frames [36]. Then, 'anvi-run-  
157 hmms' was used with default settings to identify bacterial, archaeal and fungal single copy gene  
158 collections using HMMER [37] and 'anvi-run-cogs' was used to predict gene functions in the  
159 contigs by using NCBI's Cluster of Orthologous Groups database. Taxonomy of the contigs was  
160 predicted using Centrifuge v1.0.3-beta [38] and added to the database using 'anvi-import-  
161 taxonomy-for-genes' function. Reads from each sample of the respective patient was mapped to  
162 their corresponding co-assembled contigs using Bowtie v2.2.3 and converted into sorted and  
163 indexed bam files using Samtools v1.9. Then, 'anvi-profile' was used to profile each bam file to  
164 estimate coverage and detection statistics for every contig in each sample. Then, 'anvi-merge' is  
165 used to combine the profiles of each sample and create a merged anvi'o profile. Then, 'anvi-  
166 interactive' was used to interactively visualise the distribution of the bins and identify  
167 metagenome-assembled genomes (MAGs).

168 We classified a genome bin as a MAG if it was more than 80% complete and its redundancy  
169 was below 10%. Each bin was then refined using 'anvi-refine' based on tetranucleotide  
170 frequency, mean coverage, completion and redundancy. The program 'anvi-summarize' was  
171 used to generate a HTML output stat and FASTA file with the recovered MAGs. To reconfirm  
172 the completion and redundancy of the MAGs, CheckM v1.0.13 was used [39]. To recover MAGs  
173 for the fungal genomes, 'anvi-run-hmms' was used with BUSCO [40], a collection of 83



174 eukaryotic single copy genes, ‘anvi-compute-completeness’ was used to identify completion and  
175 ‘anvi-interactive’ was used to recover the MAGS.

176 For low-abundance pathogens that had been identified by MetaPhlan2 but could not be  
177 recovered using Anvi’o, we constructed sets of completed taxon-specific reference genomes for  
178 each potential pathogen. Reference sequences were downloaded using the ncbi-genome-  
179 download script [45]. We then mapped the metagenome from each sample against the relevant  
180 reference dataset using BowTie2 version 2.3.4.1 [46]. The mapped reads were recovered using  
181 BEDtools bamtofastq and assembled into contigs using SPAdes (version 3.11.1) [49] and  
182 annotated using Prokka (version 1.12) [41]. Completion and contamination of these MAGs were  
183 assessed using CheckM. The coverage of the resulting draft genome sequences was calculated  
184 after mapping reads back to the assemblies using BowTie2 and visualised with Qualimap2 [42].  
185 To confirm species identity, average nucleotide identity was calculated from BLAST searches  
186 [43] or by using the online ANI/AAI matrix tool [44].

187 Resistance genes in the MAGs were detected using ABRicate v0.8.10 with ResFinder and  
188 CARD databases. [45]. The reports from the individual samples was compiled using the ‘—  
189 summary’ option. Antifungal resistance genes were manually identified in the annotated MAGs  
190 and curated using the Candida Genome Database. [46]. SNP distance matrices between the  
191 MAGs were calculated using Snippy v3.1 incorporating Freebayes v1.1.0 for SNP detection [47].

192

### 193 **Pathogen culture**

194 For the isolation of *Escherichia coli*, *Candida albicans* and *Enterococcus faecium*, two separate  
195 aliquots (0.1 – 0.2 g) of each stool sample were loaded into 1.5ml microcentrifuge tubes under

196 aseptic conditions. 1ml of physiological saline (0.85%) was added and the saline-stool samples  
197 were vortexed for two minutes at maximum speed to homogenise the samples completely. The  
198 homogenised samples were taken through eight 10-fold serial dilutions and 100 µl aliquots from  
199 each dilution were dispensed on to Tryptone-Bile-X-Glucoronide agar, Sabauraud-Dextrose  
200 Agar and Slanetz and Bartley medium (Oxoid). Both aliquots were plated in triplicate. The  
201 sample suspensions were spread on the plates using the cross-hatching method for confluent  
202 growth. Inoculated plates incubated at 37°C for 18 – 24 hours (for Tryptone-Bile-X-Glucoronide  
203 agar, Sabauraud-Dextrose Agar) or for 48 hours on Slanetz and Bartley medium.

204 Following incubation, the plates were examined for growth. On Tryptone-Bile-X-  
205 Glucoronide agar, raised blue-green colonies with entire margins were taken as indicative of the  
206 growth of *E. coli*. On Sabauraud-Dextrose Agar, raised white-to-cream entire colonies with  
207 yeast-like appearance were scored as *Candida*. On Slanetz and Bartley medium, smooth pink-to-  
208 red colonies with a whitish margin were indicative of the growth of *Enterococcus*. Colonies  
209 were counted on the dilution plate that showed the highest number of discrete colonies and the  
210 colony count for each of the triplicate plates per dilution was recorded.

211

## 212 **Results**

213 We initially recruited thirty serially recruited adult patients who were expected to stay on the  
214 ICU for >48 hours. As is typical of ICU patients, the study population was heterogeneous,  
215 including patients with little or no previous medical history (e.g. suffering from trauma or  
216 intracranial haemorrhage) as well as individuals with complex and chronic clinical conditions  
217 and varying immune function (Additional File 2). A total of 236 faecal samples were collected,  
218 with a median of three days between samples from each patient (Additional File 3). A set of

219 twenty-four long-stay ICU patients who provided more than five samples was selected for  
220 further study (Table 1).

221 To track the gut microbial dynamics of individual patients, we performed metagenomic  
222 sequencing of serial faecal samples, followed by community analysis to determine the relative  
223 abundance of microbial species and to assess microbial diversity using the inverse Simpson's  
224 index (Additional Files 3, 4). The median time to receipt of a sample (where timings were  
225 available) was 2.6 hours: 70% of samples were received within 6 hours and 87% within 12  
226 hours. We found no association between microbial diversity and time to receipt of sample.  
227

228 **Table 1. Clinical features and gut microbial ecology of ICU patients**

229  
230

| Patient | Age Sex | Clinical features                                 | Minimum ISI§ | Peak pathogens in gut and % abundance#                                                            | Clinical samples with same pathogen |
|---------|---------|---------------------------------------------------|--------------|---------------------------------------------------------------------------------------------------|-------------------------------------|
| 2       | 64F     | Subarachnoid haemorrhage                          | 3.9          | <i>Klebsiella pneumoniae</i> 17%                                                                  |                                     |
| 4       | 75M     | Aortic aneurysm repair                            | 1.5          | <i>Escherichia coli</i> 80%                                                                       |                                     |
| 8       | 59M     | Subarachnoid haemorrhage                          | 2.2          | None                                                                                              |                                     |
| 10      | 55M     | Multiple trauma                                   | 5.3          | None                                                                                              |                                     |
| 24      | 59M     | Drug-induced hepatitis                            | 2.4          | <i>Escherichia coli</i> 62%                                                                       |                                     |
| 25      | 46M     | Subarachnoid haemorrhage; alcoholic liver disease | 1.0          | <i>Enterococcus faecium</i> 99%<br><i>Escherichia coli</i> 38%                                    | urine                               |
| 29      | 80M     | Subcapsular hematoma; liver cancer                | 6.2          | <i>Enterococcus faecium</i> 30%                                                                   |                                     |
| 31      | 43M     | Subarachnoid haemorrhage; alcoholism              | 3.1          | <i>Proteus mirabilis</i> 18%                                                                      | sputum                              |
| 35      | 49M     | Lung transplant                                   | 1.0          | <i>Candida albicans</i> 82%                                                                       |                                     |
| 36      | 30M     | Multiple trauma                                   | 1.9          | <i>Escherichia coli</i> 68%                                                                       |                                     |
| 37      | 47M     | Multiple trauma                                   | 3.1          | None                                                                                              |                                     |
| 38      | 47M     | Insertion of left ventricular assist device       | 1.0          | <i>Candida albicans</i> 77%<br><i>Enterococcus faecium</i> 38%<br><i>Enterobacter cloacae</i> 29% | sputum<br>blood                     |
| 41      | 61M     | Oesophagectomy                                    | 1.5          | <i>Enterococcus faecium</i> 81%                                                                   |                                     |
| 45      | 63M     | Multiple trauma                                   | 5.2          | None                                                                                              |                                     |
| 46      | 25M     | Chest infection                                   | 4.0          | <i>Enterococcus faecalis</i> 29%<br><i>Escherichia coli</i> 24%                                   | urine                               |
| 47      | 46M     | Subdural haemorrhage; hepatitis C; alcoholism     | 4.8          | <i>Escherichia coli</i> 10%                                                                       |                                     |
| 49      | 65F     | Intracerebral hematoma                            | 10.2         | None                                                                                              |                                     |
| 51      | 78M     | ST-elevation myocardial infarction                | 1.2          | <i>Enterococcus faecium</i> 89%                                                                   |                                     |
| 52      | 54F     | Aortic valve repair; Marfan syndrome              | 2.1          | <i>Enterococcus faecium</i> 69%                                                                   |                                     |
| 53      | 40F     | Anaemia; end-stage renal disease                  | 1.0          | <i>Enterococcus faecium</i> 99%<br><i>Klebsiella oxytoca</i> 24%                                  | urine                               |
| 54      | 66M     | Alcoholic liver disease                           | 2.4          | <i>Enterococcus raffinosus</i> 63%<br><i>Enterococcus faecium</i> 44%                             |                                     |
| 55      | 66F     | Subdural haemorrhage                              | 3.6          | <i>Enterococcus faecium</i> 49%                                                                   |                                     |
| 57      | 84M     | Cardiac Arrest; cardiomyopathy                    | 5.6          | None                                                                                              |                                     |
| 59      | 77M     | Subdural haemorrhage                              | 4.8          | <i>Enterococcus faecalis</i> 18%                                                                  |                                     |

231  
232  
233  
234  
235

# Peak relative abundance of potential pathogens in serial faecal samples from each patient  
§ Lowest microbial diversity in serial faecal samples from each patient, as reflected by inverse Simpson's index

236 **Table 2. Gut Microbial Diversity and Clinical factors**

237 **Coefficients from a mixed effects regression model measuring the association between faecal**  
 238 **microbial alpha diversity (inverse Simpson's index) and demographics and clinical factors. Total**  
 239 **N=228 samples included in the analysis.**

240

|                         | Unit/level      | N / Mean (SD) | Coefficient | 95% Confidence interval | p-value       |
|-------------------------|-----------------|---------------|-------------|-------------------------|---------------|
| Age                     | per year        | 54.6 (14.8)   | 0.03        | (-0.03, 0.09)           | 0.382         |
| Sex                     | male vs. female | 170           | -0.14       | (-2.40, 2.12)           | 0.897         |
| Time since admission    | per day         | 18.1 (12.5)   | -0.03       | (-0.10, 0.04)           | 0.421         |
| Meropenem               | No use          | 114           | 0           | Reference               |               |
|                         | Ongoing         | 42            | -1.82       | (-3.40, -0.25)          | <b>0.024*</b> |
|                         | Starting        | 7             | -1.30       | (-3.03, 0.44)           | 0.143         |
|                         | History         | 65            | -1.29       | (-2.92, 0.35)           | 0.122         |
| Piperacillin-tazobactam | No use          | 51            | 0           | Reference               |               |
|                         | Ongoing         | 44            | 0.66        | (-1.09, 2.42)           | 0.456         |
|                         | Starting        | 4             | 1.50        | (-0.87, 3.87)           | 0.214         |
|                         | History         | 129           | 0.83        | (-0.92, 2.58)           | 0.350         |
| Other antimicrobial     | No use          | 32            | 0           | Reference               |               |
|                         | Ongoing         | 55            | -1.16       | (-3.12, 0.79)           | 0.242         |
|                         | Starting        | 8             | -0.03       | (-2.15, 2.09)           | 0.980         |
|                         | History         | 133           | -0.99       | (-2.83, 0.85)           | 0.290         |
| Bristol Stool Index     | 1-3             | 9             | 0           | Reference               |               |
|                         | 4               | 28            | -0.54       | (-2.25, 1.17)           | 0.536         |
|                         | 5               | 48            | 0.32        | (-1.40, 2.04)           | 0.715         |
|                         | 6               | 75            | -0.19       | (-1.83, 1.46)           | 0.823         |
|                         | 7               | 62            | -0.70       | (-2.41, 1.02)           | 0.423         |
|                         | Missing         | 6             | 0.04        | (-2.22, 2.30)           | 0.975         |
| SOFA score              | per point       | 6.1 (3.4)     | -0.15       | (-0.31, 0.01)           | 0.065         |

241

242 SOFA score: sequential organ failure score, higher values = greater morbidity

243 \*: p<0.05

244 N: number of samples with each level of covariate

245 SD: standard deviation

## 246 **Loss of gut microbial diversity with meropenem**

247 We found no general trend towards decreased gut microbial diversity with time spent in ICU.  
248 Similarly, we found no statistically significant associations between microbial diversity and stool  
249 consistency or Sequential Organ Failure Assessment (SOFA) score, which reflects overall health  
250 (Table 2). However, in 11 of 24 patients, microbial diversity in the final sample was lower than  
251 in the initial sample (Table 2) and in two-thirds of patients, we saw a fall in diversity at some  
252 stage during their stay in ICU to an inverse Simpson's index of  $<4$ : a figure which has been  
253 associated with decreased survival in immunocompromised patients [48] (Table 1; Additional  
254 File 4). Remarkably, in a third of our patients, diversity fell, in at least one sample, to a  
255 precipitously low level, with an inverse Simpson's index  $< 2$ , echoing findings from previous  
256 studies that used 16S amplicon sequencing [49, 50].

257 All but one of our ICU patients were treated with antimicrobial chemotherapy, varying from  
258 one to six classes of antibacterial or antifungal agent. Surprisingly, in these patients,  
259 administration of most antibiotics, including the broad-spectrum agent piperacillin-tazobactam,  
260 failed to trigger statistically detectable changes in microbial diversity, despite apparent  
261 sensitivity of gut commensals to such agents [6]. However, current use of the intravenous agent  
262 meropenem was significantly associated with loss of gut microbial diversity in our ICU patients,  
263 confirming similar findings with healthy adults (change in inverse Simpsons index  $-1.8$ , 95%  
264 CI= $-3.4$  to  $-0.25$ ;  $p=0.024$ ; Table 2) [51].

265

266

267

## 268 **Loss of beneficial microorganisms**

269 For many patients during their stay in ICU, we observed an absence or drastic reduction in the  
270 gut of microorganisms thought to confer beneficial effects on the host. Loss of beneficial  
271 organisms was particularly marked after administration of meropenem (Figure 1). Examples  
272 include *Faecalibacterium prauznetzii*, a butyrate-producing bacterium with anti-inflammatory  
273 properties; *Akkermansia muciniphila*, a mucin-degrading bacterium inversely related to diabetes  
274 and inflammation (both undetectable in final samples from 18 patients) [52, 53]; *Bacteroides*  
275 *thetaiotaomicron*, which inhibits colonisation of the gut by *Candida albicans* (undetectable in all  
276 samples from eight patients; lost in four) [54]; *Clostridium bolteae* (lost in seven patients) and  
277 *Blautia producta* (undetectable in 13 patients), which strengthen colonisation resistance against  
278 vancomycin-resistant *Enterococci* [55]; and candidate probiotic species such as *Bifidobacterium*  
279 *longum* (undetectable in all samples from ten patients; lost in six); and *Bifidobacterium*  
280 *adolescentis* (undetectable in all samples from nineteen patients; lost in four) [56].

281

## 282 **Domination of the gut by individual pathogens and commensals**

283 In 75% of the long-stay ICU patients, we saw marked increases in the relative abundance of  
284 individual pathogens in stool samples. These included ESKAPE pathogens (*Enterococcus*  
285 *faecium*, *Klebsiella pneumoniae*, *Enterobacter cloacae*), other species of Enterobacteriaceae  
286 (*Escherichia coli*, *Klebsiella oxytoca*, *Proteus mirabilis*) and enterococci (*E. faecalis* and *E.*  
287 *raffinosis*) and the fungal pathogen *Candida albicans*. During these episodes of pathogen  
288 domination, the relative abundance of the pathogen often exceeded 50% of sequence reads—in  
289 one patient, patient 53, in seven consecutive samples, >80% of evaluable sequences were  
290 assigned to *E. faecium* (Figure 2).

291 Through quantitative culture of pathogens from serial faecal samples, we documented  
292 changes in absolute abundance in some cases (Additional File 5). In six patients, the same  
293 species of pathogen was isolated from clinical samples from outside the gut (Table 1).

294 Antibiotics are known to provoke overgrowth in the gut of microbial species not known to be  
295 pathogens [51, 57, 58]. We saw the relative abundance of the archaeon *Methanobrevibacter*  
296 *smithii* exceed 10% of reads in nine ICU patients—in one sample, this organism accounted for  
297 50% of sequence reads. Other apparent commensals showing rises in relative abundance to  
298 >50% include *Streptococcus thermophilus*, *Alistipes onderdonkii*, *Bifidobacterium longum*, an  
299 unnamed species from the *Erysipelotrichaceae*, *Ruminococcus torques* and an unclassified  
300 species of *Subdoligranulum* (Figure 1; Additional File 1).

301

### 302 **Cryptic nosocomial transmission**

303 Through a combination of co-assembly, *de novo* binning of metagenomic reads and evaluation of  
304 single copy bacterial and fungal core genes, we obtained metagenome-assembled genomes  
305 (MAGs) of potential pathogens and used them to reconstruct pathogen biology and  
306 epidemiology, including multi-locus sequence types (Additional File 6). We found that pathogen  
307 blooms within an individual patient were typically clonal, i.e. caused by a single strain, although  
308 there was often a cloud of diversity in single-nucleotide polymorphisms among genomes from  
309 multiple samples (Additional File 7). Pathogens dominating the gut microbiota in ICU patients  
310 were also typically inherently resistant to antibiotics (*Candida albicans*) or possessed genes  
311 associated with antimicrobial resistance—vancomycin-resistance genes were detected in two  
312 strains of *E. faecium* and aminoglycoside resistance genes in two strains of *E. coli*, one of which  
313 also encoded an extended-spectrum beta-lactamase (Additional File 8).



314 In one patient, Patient 25, where we sequenced multiple isolates cultured from the first sample  
315 from the patient, we detected two strains of *E. coli* belonging to distinct sequence types, ST131  
316 and ST315. However, the ST131 strain was subsequently lost after administration of antibiotics.  
317 Enterococcal blooms were seen in eleven patients (Figure 2). In six cases, the dominant strain  
318 belonged not just to the same species, *E. faecium*, but also to the same sequence type, ST80,  
319 which is a well-documented cause of nosocomial outbreaks across the globe [59–61]. We found  
320 that the *E. faecium* MAGs belonging to ST80 in patients 51, 54, 55 differed by less than twenty  
321 SNPs (Additional File 8), providing strong evidence of cross-colonization with a common strain,  
322 spreading between patients and/or from a common source in the hospital. Interestingly, all three  
323 patients had overlapping stays in adjacent rooms on the ICU.

324

## 325 Discussion

326

327 Here, we have shown the utility of shotgun metagenomics in in ICU patients in surveillance of  
328 the gut microbiota, documenting the loss of gut microbial diversity and domination of the gut by  
329 drug-resistant pathogens. Our use of shotgun metagenomics confirms results of previous studies  
330 on ICU patients using less powerful sequence-based approaches, linking loss of gut microbial  
331 diversity to adverse clinical outcomes and loss of colonization resistance, [19–21, 49, 50, 62–69].  
332 However, with shotgun metagenomics, we have been able to reconstruct informative  
333 metagenome-assembled genomes, allowing us to characterise pathogens, identify resistance  
334 determinants and document cryptic nosocomial transmission of a clone of *Enterococcus faecium*  
335 that colonised three patients.

336 It is well established that administration of antibiotics leads to loss of diversity in the gut  
337 microbiota [70–73]. Nonetheless, although all but one of our patients received antibiotics, we  
338 saw a statistically significant loss of diversity—and marked loss of beneficial organisms—only  
339 after administration of meropenem (Figure 1). Similar profound and longstanding effects of this  
340 agent on gut microbial diversity have been documented in healthy adults [51]. Although we were  
341 unable to detect any effect of other antimicrobials, given the small sample size, we cannot rule  
342 out small but significant effects for less commonly used agents.

343 The contrast between the effect of meropenem and apparent lack of effect of other broad-  
344 spectrum agents such as piperacillin-tazobactam suggests that pharmacokinetics plays a key role  
345 in determining impact on the gut microbiota and that there is scope for tailoring antibiotic  
346 regimes to spare the gut microbiota, building on previous studies confirming the low-risk status  
347 of ureidopenicillins such as piperacillin on the risk of *Clostridioides difficile* infection or  
348 colonisation with vancomycin-resistant enterococci [74, 75].

349 We have used shotgun metagenomics to document domination of the gut microbiota by  
350 microbial pathogens in most ICU patients. Although from sequences alone, it is hard to  
351 determine whether increases in relative abundance of pathogens reflect an increase in the  
352 biomass of pathogens or simply a loss of commensals [76, 77], we were able to use microbial  
353 culture to confirm that, at least in some cases, there was a genuine increase in the absolute  
354 abundance of the pathogen.

355 In a quarter of our patients, in line with other similar attempts at sequence-based surveillance  
356 in vulnerable patients[19, 20], the same species of pathogen was isolated from clinical samples  
357 from outside the gut. However, as our clinical isolates were not subjected to genome sequencing,  
358 we cannot be certain that they belonged to the strains associated with domination of the gut.

359        Interesting, we also saw episodes of ecological domination by apparent commensals. The  
360        significance of these episodes remains uncertain. A recent study has suggested that commensal  
361        bacteria carry diverse uncharacterised resistance genes that contribute to their selection after  
362        antibiotic therapy [78]. It is worth noting that *M. smithii*, like other Archaea, is intrinsically  
363        resistant to antibiotics as a result of its distinctive non-bacterial biology [79].

364

## 365        **Conclusions**

366

367        Here, we have shown that surveillance of the gut microbiota in long-stay ICU patients using  
368        shotgun metagenomics is capable of detecting episodes of low diversity and pathogen  
369        domination, as well as providing genome-level resolution of colonising pathogens and evidence  
370        of cryptic nosocomial transmission. We have also shown that use of meropenem is associated  
371        with ecological disruption of the gut microbiota. These observations pave the way for precise  
372        patient-specific interventions that protect the gut microbiota (e.g. enhanced infection control,  
373        tailored use of microbiota-sparing antibiotics, oral administration of antibiotic-absorbing  
374        charcoal or of a beta-lactamase) [80, 81].

375        Although we failed to find a link between gut microbial diversity or pathogen domination of  
376        the gut and clinical outcomes in our group of ICU patients, such evidence has been documented  
377        for similar groups of vulnerable patients [19, 21, 63], where ecological approaches to restoring  
378        gut microbial diversity, such as faecal microbiota transplants, are under evaluation [16–18, 82,  
379        83]. Similar intervention studies—underpinned by the kind of metagenomic surveillance we have  
380        established here—are likely to clarify whether maintenance or restoration of gut microbial  
381        diversity influences clinical outcomes in long-stay ICU patients.

382

## 383 **Abbreviations**

384

385 **ICU:** Intensive Care Unit      **MAG:** metagenome-assembled genome

386 **SOFA:** Sequential Organ Failure Assessment

387

## 388 **Declarations**

389

### 390 **Ethics approval and consent to participate**

391 Wales Research Ethics Committee 3 granted ethical approval for the study under the auspices of  
392 the UK's National Research Ethics Service (Reference number 17/WA/0073; Integrated  
393 Research Application System ID 222006) and the study was conducted according to the World  
394 Medical Association's Declaration of Helsinki. Informed consent was obtained from the patient  
395 or from the patient's consultee (surrogate decision-maker) using standard consent procedures for  
396 clinical studies of ICU populations within the UK, which include provision for patients who lack  
397 capacity.

398

### 399 **Consent for publication**

400 Not applicable

401

### 402 **Availability of data and material**

403 Metagenome sequences have been deposited in the Sequence Read Archive  
404 (<https://www.ncbi.nlm.nih.gov/sra>) under Bioproject reference SUB5204757

405

#### 406 **Competing interests**

407 The authors declare that they have no competing interests

408

#### 409 **Funding**

410 This work was supported in Birmingham by the National Institute for Health Research Surgical  
411 Reconstruction and Microbiology Research Centre (NIHR SRMRC). This paper presents  
412 independent research funded by the National Institute for Health research (NIHR). The views  
413 expressed are those of the authors and not necessarily those of the NHS, the NIHR or the  
414 Department of Health. The authors gratefully acknowledge the support of the Biotechnology and  
415 Biological Sciences Research Council (BBSRC); this research was funded in Norwich by the  
416 BBSRC intramural award BBS/E/F/00044414 to M.J.P. at the Quadram Institute Bioscience.

417

#### 418 **Authors' contributions**

419 BAO, TW, RG, FDH and AC designed and supervised the clinical study. FDH, RG, AC, AB and  
420 CS carried out the clinical components, sample and data collection. AR, GS, EF-N, WvS. and  
421 MJP designed and/or carried out sequencing, computational cultural or statistical analysis. MJP  
422 wrote the paper. All authors read and approved the paper.

423

#### 424 **Acknowledgements**

425 We thank ICU staff for their tireless work and contributions to this study.

426

## 427 **Figures**

428

### 429 **Figure 1. Relative abundance of gut microorganisms among patients who began** 430 **meropenem during the study**

431 This heat map shows the top 50 taxa by average relative abundance across the whole dataset.

432 Grey-scale shading of cells shows relative abundance: 0 (no shading) 0-1% (light grey), 1-10%

433 (mid-grey) and >10% (dark grey). Coloured shading of columns reflects meropenem use: no use

434 (blank); ongoing use (dark blue); starting meropenem or a history of meropenem (light blue)

435

### 436 **Figure 2. Pathogen domination of the gut microbiota**

437 Timelines for patients showing pathogen domination, with relative abundance assessed by

438 percentage of reads mapping to metagenome-assembled genomes. Various antibiotics were given

439 for treatment purposes during the study period.

440

441

## 442 **Additional Files**

443 **Additional File 1.** Stool data and MetaPhlan2 output

444 **Additional File 2.** Patient data

445 **Additional File 3.** Sequence data

446 **Additional File 4.** Diversity indices

447 **Additional File 5.** Pathogen abundance on culture

448 **Additional File 6.** Metagenome-assembled genomes statistics

449 **Additional File 7.** Identification of antibiotic resistance genes

450 **Additional File 8.** SNP matrices for enterococcal metagenome-assembled genomes

451

## 452 **References**

453

454 1. Kim S, Covington A, Pamer EG: The intestinal microbiota: Antibiotics, colonization  
455 resistance, and enteric pathogens. *Immunol Rev* 2017, 279:90-105.

456 2. Feng Q, Chen WD, Wang YD: Gut microbiota: An integral moderator in health and  
457 disease. *Front Microbiol* 2018, 9:151.

458 3. Dickson RP: The microbiome and critical illness. *Lancet Respir Med* 2016, 4:59-72.

459 4. Chang SJ, Huang HH: Diarrhea in enterally fed patients: blame the diet. *Curr Opin Clin  
460 Nutr Metab Care* 2013, 16:588-594.

461 5. Lustrì BC, Sperandio V, Moreira CG: Bacterial chat: Intestinal metabolites and signals in  
462 host-microbiota-pathogen interactions. *Infect Immun* 2017, 85

- 463 6. Maier L, Pruteanu M, Kuhn M, Zeller G, Telzerow A, Anderson EE, Brochado AR,  
464 Fernandez KC, Dose H, Mori H, Patil KR, Bork P, Typas A: Extensive impact of non-  
465 antibiotic drugs on human gut bacteria. *Nature* 2018, 555:623-628.
- 466 7. Wischmeyer PE, McDonald D, Knight R: Role of the microbiome, probiotics, and  
467 ‘dysbiosis therapy’ in critical illness. *Curr Opin Crit Care* 2016, 22:347-353.
- 468 8. Pamer EG: Resurrecting the intestinal microbiota to combat antibiotic-resistant pathogens.  
469 *Science* 2016, 352:535-538.
- 470 9. Manges AR, Steiner TS, Wright AJ: Fecal microbiota transplantation for the intestinal  
471 decolonization of extensively antimicrobial-resistant opportunistic pathogens: a review.  
472 *Infect Dis (Lond)* 2016, 48:587-592.
- 473 10. Morrow LE, Wischmeyer P: Blurred lines: Dysbiosis and probiotics in the icu. *Chest* 2017,  
474 151:492-499.
- 475 11. Haak BW, Levi M, Wiersinga WJ: Microbiota-targeted therapies on the intensive care unit.  
476 *Curr Opin Crit Care* 2017, 23:167-174.
- 477 12. Wolff NS, Hugenholtz F, Wiersinga WJ: The emerging role of the microbiota in the ICU.  
478 *Crit Care* 2018, 22:78.
- 479 13. McClave SA, Patel J, Bhutiani N: Should fecal microbial transplantation be used in the  
480 ICU. *Current Opinion in Critical Care* 2018, 24:105-111.
- 481 14. Limketkai BN, Hendler S, Ting PS, Parian AM: Fecal microbiota transplantation for the  
482 critically ill patient. *Nutr Clin Pract* 2018,
- 483 15. Ruppe E, Martin-Loeches I, Rouze A, Levast B, Ferry T, Timsit JF: What’s new in  
484 restoring the gut microbiota in ICU patients? Potential role of faecal microbiota  
485 transplantation. *Clin Microbiol Infect* 2018, 24:803-805.



- 486 16. Dinh A, Fessi H, Duran C, Batista R, Michelon H, Bouchand F, Lepeule R, Vittecoq D,  
487 Escaut L, Sobhani I, Lawrence C, Chast F, Ronco P, Davido B: Clearance of carbapenem-  
488 resistant Enterobacteriaceae vs vancomycin-resistant enterococci carriage after faecal  
489 microbiota transplant: a prospective comparative study. *J Hosp Infect* 2018, 99:481-486.
- 490 17. Davido B, Batista R, Fessi H, Michelon H, Escaut L, Lawrence C, Denis M, Perronne C,  
491 Salomon J, Dinh A: Fecal microbiota transplantation to eradicate vancomycin-resistant  
492 enterococci colonization in case of an outbreak. *Med Mal Infect* 2018,
- 493 18. Suez J, Zmora N, Zilberman-Schapira G, Mor U, Dori-Bachash M, Bashiardes S, Zur M,  
494 Regev-Lehavi D, Ben-Zeev Brik R, Federici S, Horn M, Cohen Y, Moor AE, Zeevi D,  
495 Korem T, Kotler E, Harmelin A, Itzkovitz S, Maharshak N, Shibolet O, Pevsner-Fischer M,  
496 Shapiro H, Sharon I, Halpern Z, Segal E, Elinav E: Post-antibiotic gut mucosal microbiome  
497 reconstitution is impaired by probiotics and improved by autologous FMT. *Cell* 2018,  
498 174:1406-1423.e16.
- 499 19. Taur Y, Xavier JB, Lipuma L, Ubeda C, Goldberg J, Gobourne A, Lee YJ, Dubin KA,  
500 Socci ND, Viale A, Perales MA, Jenq RR, van den Brink MR, Pamer EG: Intestinal  
501 domination and the risk of bacteremia in patients undergoing allogeneic hematopoietic  
502 stem cell transplantation. *Clin Infect Dis* 2012, 55:905-914.
- 503 20. Tamburini FB, Andermann TM, Tkachenko E, Senchyna F, Banaei N, Bhatt AS: Precision  
504 identification of diverse bloodstream pathogens in the gut microbiome. *Nat Med* 2018,  
505 24:1809-1814.
- 506 21. Freedberg DE, Zhou MJ, Cohen ME, Annavajhala MK, Khan S, Moscoso DI, Brooks C,  
507 Whittier S, Chong DH, Uhlemann AC, Abrams JA: Pathogen colonization of the  
508 gastrointestinal microbiome at intensive care unit admission and risk for subsequent death

- 509 or infection. Intensive Care Med 2018,
- 510 22. Pallen MJ: Diagnostic metagenomics: potential applications to bacterial, viral and parasitic  
511 infections. Parasitology 2014, 141:1856-1862.
- 512 23. Hillmann B, Al-Ghalith GA, Shields-Cutler RR, Zhu Q, Gohl DM, Beckman KB, Knight  
513 R, Knights D: Evaluating the information content of shallow shotgun metagenomics.  
514 mSystems 2018, 3
- 515 24. Connor TR, Loman NJ, Thompson S, Smith A, Southgate J, Poplawski R, Bull MJ,  
516 Richardson E, Ismail M, Thompson SE, Kitchen C, Guest M, Bakke M, Sheppard SK,  
517 Pallen MJ: CLIMB (the Cloud Infrastructure for Microbial Bioinformatics): an online  
518 resource for the medical microbiology community. Microb Genom 2016, 2:e000086.
- 519 25. BaseMount: A Linux command line interface for BaseSpace  
520 [[https://blog.basespace.illumina.com/2015/07/23/basemount-a-linux-command-line-  
521 interface-for-basespace/](https://blog.basespace.illumina.com/2015/07/23/basemount-a-linux-command-line-interface-for-basespace/)]
- 522 26. FastQC: a quality control tool for high throughput sequence data.  
523 [<http://www.bioinformatics.babraham.ac.uk/projects/fastqc>]
- 524 27. Shen W, Le S, Li Y, Hu F: SeqKit: A Cross-Platform and Ultrafast Toolkit for FASTA/Q  
525 File Manipulation. PLoS One 2016, 11:e0163962.
- 526 28. Bolger AM, Lohse M, Usadel B: Trimmomatic: a flexible trimmer for Illumina sequence  
527 data. Bioinformatics 2014, 30:2114-2120.
- 528 29. Li H, Handsaker B, Wysoker A, Fennell T, Ruan J, Homer N, Marth G, Abecasis G,  
529 Durbin R, 1000 GPDPS: The Sequence Alignment/Map format and SAMtools.  
530 Bioinformatics 2009, 25:2078-2079.
- 531 30. Quinlan AR: BEDTools: The Swiss-Army Tool for Genome Feature Analysis. Curr Protoc

- 532           Bioinformatics 2014, 47:11.12.1-34.
- 533    31.   Truong DT, Franzosa EA, Tickle TL, Scholz M, Weingart G, Pasolli E, Tett A,  
534           Huttenhower C, Segata N: MetaPhlan2 for enhanced metagenomic taxonomic profiling.  
535           Nat Methods 2015, 12:902-903.
- 536    32.   R-Core-Team.: R: A language and environment for statistical computing. R Foundation for  
537           Statistical Computing, Vienna, Austria. 2018,
- 538    33.   nlme: Linear and Nonlinear Mixed Effects Models. R package version 3.1-137  
539           [<https://CRAN.R-project.org/package=nlme>]
- 540    34.   Li D, Luo R, Liu CM, Leung CM, Ting HF, Sadakane K, Yamashita H, Lam TW:  
541           MEGAHIT v1.0: A fast and scalable metagenome assembler driven by advanced  
542           methodologies and community practices. Methods 2016, 102:3-11.
- 543    35.   Eren AM, Esen ÖC, Quince C, Vineis JH, Morrison HG, Sogin ML, Delmont TO: Anvi'o:  
544           an advanced analysis and visualization platform for 'omics data. PeerJ 2015, 3:e1319.
- 545    36.   Hyatt D, Chen GL, Locascio PF, Land ML, Larimer FW, Hauser LJ: Prodigal: prokaryotic  
546           gene recognition and translation initiation site identification. BMC Bioinformatics 2010,  
547           11:119.
- 548    37.   Potter SC, Luciani A, Eddy SR, Park Y, Lopez R, Finn RD: HMMER web server: 2018  
549           update. Nucleic Acids Res 2018, 46:W200-W204.
- 550    38.   Kim D, Song L, Breitwieser FP, Salzberg SL: Centrifuge: rapid and sensitive classification  
551           of metagenomic sequences. Genome Res 2016, 26:1721-1729.
- 552    39.   Parks DH, Imelfort M, Skennerton CT, Hugenholtz P, Tyson GW: CheckM: assessing the  
553           quality of microbial genomes recovered from isolates, single cells, and metagenomes.  
554           Genome Res 2015, 25:1043-1055.

- 555 40. Waterhouse RM, Seppey M, Simão FA, Manni M, Ioannidis P, Klioutchnikov G,  
556 Kriventseva EV, Zdobnov EM: BUSCO applications from quality assessments to gene  
557 prediction and phylogenomics. *Mol Biol Evol* 2017,
- 558 41. Seemann T: Prokka: rapid prokaryotic genome annotation. *Bioinformatics* 2014, 30:2068-  
559 2069.
- 560 42. Okonechnikov K, Conesa A, García-Alcalde F: Qualimap 2: advanced multi-sample  
561 quality control for high-throughput sequencing data. *Bioinformatics* 2016, 32:292-294.
- 562 43. Altschul SF, Gish W, Miller W, Myers EW, Lipman DJ: Basic local alignment search tool.  
563 *J Mol Biol* 1990, 215:403-410.
- 564 44. Rodriguez-R LM, Konstantinidis KT: The enveomics collection: a toolbox for specialized  
565 analyses of microbial genomes and metagenomes. *PeerJ Preprints* 2016, 4:e1900v1.
- 566 45. ABRicate [<https://github.com/tseemann/abricate>]
- 567 46. Skrzypek MS, Binkley J, Binkley G, Miyasato SR, Simison M, Sherlock G: The Candida  
568 Genome Database (CGD): incorporation of Assembly 22, systematic identifiers and  
569 visualization of high throughput sequencing data. *Nucleic Acids Res* 2017, 45:D592-D596.
- 570 47. Snippy: rapid haploid variant calling and core SNP phylogeny  
571 [<https://github.com/tseemann/snippy>]
- 572 48. Pamer EG, Taur Y, Jenq R, van den Brink MRM: Impact of the intestinal microbiota on  
573 infections and survival following hematopoietic stem cell transplantation. *Blood* 2014,  
574 124:SCI-48.
- 575 49. Zaborin A, Smith D, Garfield K, Quensen J, Shakhsher B, Kade M, Tirrell M, Tiedje J,  
576 Gilbert JA, Zaborina O, Alverdy JC: Membership and behavior of ultra-low-diversity  
577 pathogen communities present in the gut of humans during prolonged critical illness. *MBio*

- 578 2014, 5:e01361-14.
- 579 50. McDonald D, Ackermann G, Khailova L, Baird C, Heyland D, Kozar R, Lemieux M,  
580 Derenski K, King J, Vis-Kampen C, Knight R, Wischmeyer PE: Extreme dysbiosis of the  
581 microbiome in critical illness. *mSphere* 2016, 1:207.
- 582 51. Palleja A, Mikkelsen KH, Forslund SK, Kashani A, Allin KH, Nielsen T, Hansen TH,  
583 Liang S, Feng Q, Zhang C, Pyl PT, Coelho LP, Yang H, Wang J, Typas A, Nielsen MF,  
584 Nielsen HB, Bork P, Wang J, Vilsbøll T, Hansen T, Knop FK, Arumugam M, Pedersen O:  
585 Recovery of gut microbiota of healthy adults following antibiotic exposure. *Nat Microbiol*  
586 2018, 3:1255-1265.
- 587 52. Martín R, Bermúdez-Humarán LG, Langella P: Searching for the bacterial effector: The  
588 example of the multi-skilled commensal bacterium *Faecalibacterium prausnitzii*. *Front*  
589 *Microbiol* 2018, 9:1298.
- 590 53. Cani PD, de Vos WM: Next-Generation Beneficial Microbes: The Case of *Akkermansia*  
591 *muciniphila*. *Front Microbiol* 2017, 8:1765.
- 592 54. Fan D, Coughlin LA, Neubauer MM, Kim J, Kim MS, Zhan X, Simms-Waldrup TR, Xie Y,  
593 Hooper LV, Koh AY: Activation of HIF-1 $\alpha$  and LL-37 by commensal bacteria inhibits  
594 *Candida albicans* colonization. *Nat Med* 2015, 21:808-814.
- 595 55. Caballero S, Kim S, Carter RA, Leiner IM, Sušac B, Miller L, Kim GJ, Ling L, Pamer EG:  
596 Cooperating commensals restore colonization resistance to vancomycin-resistant  
597 *enterococcus faecium*. *Cell Host & Microbe* 2017, 21:592-602.e4.
- 598 56. Arbolea S, Watkins C, Stanton C, Ross RP: Gut bifidobacteria populations in human  
599 health and aging. *Front Microbiol* 2016, 7:1204.
- 600 57. Hildebrand F, Moitinho-Silva L, Blasche S, Jahn MTT, Gossmann TI, Heuerta Cepas J,

- 601 Hercog R, Luetge M, Bahram M, Pryszlak A, Alves RJ, Waszak SM, Zhu A, Ye L, Costea  
602 PI, Aalvink S, Belzer C, Forslund SK, Sunagawa S, Hentschel U, Merten C, Patil KR,  
603 Benes V, Bork P: Antibiotics-induced monodominance of a novel gut bacterial order. *Gut*  
604 2019,
- 605 58. Dubourg G, Lagier JC, Armougom F, Robert C, Audoly G, Papazian L, Raoult D: High-  
606 level colonisation of the human gut by Verrucomicrobia following broad-spectrum  
607 antibiotic treatment. *Int J Antimicrob Agents* 2013, 41:149-155.
- 608 59. Shaw TD, Fairley DJ, Schneiders T, Pathiraja M, Hill RLR, Werner G, Elborn JS,  
609 McMullan R: The use of high-throughput sequencing to investigate an outbreak of  
610 glycopeptide-resistant *Enterococcus faecium* with a novel quinupristin-dalfopristin  
611 resistance mechanism. *Eur J Clin Microbiol Infect Dis* 2018, 37:959-967.
- 612 60. Lee RS, Goncalves da Silva A, Baines SL, Strachan J, Ballard S, Carter GP, Kwong JC,  
613 Schultz MB, Bulach DM, Seemann T, Stinear TP, Howden BP: The changing landscape of  
614 vancomycin-resistant *Enterococcus faecium* in Australia: a population-level genomic study.  
615 *J Antimicrob Chemother* 2018, 73:3268-3278.
- 616 61. Zhou X, Chlebowicz MA, Bathoorn E, Rosema S, Couto N, Lokate M, Arends JP,  
617 Friedrich AW, Rossen JWA: Elucidating vancomycin-resistant *Enterococcus faecium*  
618 outbreaks: the role of clonal spread and movement of mobile genetic elements. *J*  
619 *Antimicrob Chemother* 2018, 73:3259-3267.
- 620 62. Hayakawa M, Asahara T, Henzan N, Murakami H, Yamamoto H, Mukai N, Minami Y,  
621 Sugano M, Kubota N, Uegaki S, Kamoshida H, Sawamura A, Nomoto K, Gando S:  
622 Dramatic changes of the gut flora immediately after severe and sudden insults. *Dig Dis Sci*  
623 2011, 56:2361-2365.

- 624 63. Ojima M, Motooka D, Shimizu K, Gotoh K, Shintani A, Yoshiya K, Nakamura S, Ogura  
625 H, Iida T, Shimazu T: Metagenomic analysis reveals dynamic changes of whole gut  
626 microbiota in the acute phase of intensive care unit patients. *Dig Dis Sci* 2016, 61:1628-  
627 1634.
- 628 64. Yeh A, Rogers MB, Firek B, Neal MD, Zuckerbraun BS, Morowitz MJ: Dysbiosis across  
629 multiple body sites in critically ill adult surgical patients. *Shock* 2016, 46:649-654.
- 630 65. Buelow E, Bello González TDJ, Fuentes S, de Steenhuijsen Piters WAA, Lahti L,  
631 Bayjanov JR, Majoor EAM, Braat JC, van Mourik MSM, Oostdijk EAN, Willems RJL,  
632 Bonten MJM, van Passel MWJ, Smidt H, van Schaik W: Comparative gut microbiota and  
633 resistome profiling of intensive care patients receiving selective digestive tract  
634 decontamination and healthy subjects. *Microbiome* 2017, 5:88.
- 635 66. Raymond F, Ouameur AA, Deraspe M, Iqbal N, Gingras H, Dridi B, Leprohon P, Plante  
636 PL, Giroux R, Berube E, Frenette J, Boudreau DK, Simard JL, Chabot I, Domingo MC,  
637 Trottier S, Boissinot M, Huletsky A, Roy PH, Ouellette M, Bergeron MG, Corbeil J: The  
638 initial state of the human gut microbiome determines its reshaping by antibiotics. *ISME J*  
639 2016, 10:707-720.
- 640 67. Lankelma JM, van Vught LA, Belzer C, Schultz MJ, van der Poll T, de Vos WM,  
641 Wiersinga WJ: Critically ill patients demonstrate large interpersonal variation in intestinal  
642 microbiota dysregulation: a pilot study. *Intensive Care Med* 2017, 43:59-68.
- 643 68. Lamarche D, Johnstone J, Zytaruk N, Clarke F, Hand L, Loukov D, Szamosi JC, Rossi L,  
644 Schenck LP, Verschoor CP, McDonald E, Meade MO, Marshall JC, Bowdish DME,  
645 Karachi T, Heels-Ansdell D, Cook DJ, Surette MG: Microbial dysbiosis and mortality  
646 during mechanical ventilation: a prospective observational study. *Respir Res* 2018, 19:220.

- 647 69. Livanos AE, Snider EJ, Whittier S, Chong DH, Wang TC, Abrams JA, Freedberg DE:  
648 Rapid gastrointestinal loss of Clostridial Clusters IV and XIVa in the ICU associates with  
649 an expansion of gut pathogens. PLoS ONE 2018, 13:e0200322.
- 650 70. Thiemann S, Smit N, Strowig T: Antibiotics and the intestinal microbiome : Individual  
651 responses, resilience of the ecosystem, and the susceptibility to infections. Curr Top  
652 Microbiol Immunol 2016, 398:123-146.
- 653 71. Lange K, Buerger M, Stallmach A, Bruns T: Effects of antibiotics on gut microbiota. Dig  
654 Dis 2016, 34:260-268.
- 655 72. Modi SR, Collins JJ, Relman DA: Antibiotics and the gut microbiota. J Clin Invest 2014,  
656 124:4212-4218.
- 657 73. Ianiro G, Tilg H, Gasbarrini A: Antibiotics as deep modulators of gut microbiota: between  
658 good and evil. Gut 2016, 65:1906-1915.
- 659 74. Bradley SJ, Wilson AL, Allen MC, Sher HA, Goldstone AH, Scott GM: The control of  
660 hyperendemic glycopeptide-resistant *Enterococcus* spp. on a haematology unit by changing  
661 antibiotic usage. J Antimicrob Chemother 1999, 43:261-266.
- 662 75. Wilcox MH: Gastrointestinal disorders and the critically ill. Clostridium difficile infection  
663 and pseudomembranous colitis. Best Pract Res Clin Gastroenterol 2003, 17:475-493.
- 664 76. Props R, Kerckhof FM, Rubbens P, De Vrieze J, Hernandez Sanabria E, Waegeman W,  
665 Monsieurs P, Hammes F, Boon N: Absolute quantification of microbial taxon abundances.  
666 ISME J 2017, 11:584-587.
- 667 77. Vandeputte D, Kathagen G, D'hoel K, Vieira-Silva S, Valles-Colomer M, Sabino J, Wang  
668 J, Tito RY, De Commer L, Darzi Y, Vermeire S, Falony G, Raes J: Quantitative  
669 microbiome profiling links gut community variation to microbial load. Nature 2017,



- 670 551:507-511.
- 671 78. Ruppé E, Ghozlane A, Tap J, Pons N, Alvarez AS, Maziers N, Cuesta T, Hernando-Amado  
672 S, Clares I, Martínez JL, Coque TM, Baquero F, Lanza VF, Máiz L, Goulenok T, de  
673 Lastours V, Amor N, Fantin B, Wieder I, Andremont A, van Schaik W, Rogers M, Zhang  
674 X, Willems RJL, de Brevern AG, Batto JM, Blottière HM, Léonard P, Lédard V, Letur A,  
675 Levenez F, Weiszer K, Haimet F, Doré J, Kennedy SP, Ehrlich SD: Prediction of the  
676 intestinal resistome by a three-dimensional structure-based method. *Nat Microbiol* 2019,  
677 4:112-123.
- 678 79. Khelaifia S, Drancourt M: Susceptibility of archaea to antimicrobial agents: applications to  
679 clinical microbiology. *Clin Microbiol Infect* 2012, 18:841-848.
- 680 80. Kaleko M, Bristol JA, Hubert S, Parsley T, Widmer G, Tzipori S, Subramanian P, Hasan  
681 N, Koski P, Kokai-Kun J, Sliman J, Jones A, Connelly S: Development of SYN-004, an  
682 oral beta-lactamase treatment to protect the gut microbiome from antibiotic-mediated  
683 damage and prevent *Clostridium difficile* infection. *Anaerobe* 2016, 41:58-67.
- 684 81. de Gunzburg J, Ghozlane A, Ducher A, Le Chatelier E, Duval X, Ruppé E, Armand-  
685 Lefevre L, Sablier-Gallis F, Burdet C, Alavoine L, Chachaty E, Augustin V, Varastet M,  
686 Levenez F, Kennedy S, Pons N, Mentré F, Andremont A: Protection of the human gut  
687 microbiome from antibiotics. *J Infect Dis* 2018, 217:628-636.
- 688 82. Taur Y, Coyte K, Schluter J, Robilotti E, Figueroa C, Gjonbalaj M, Littmann ER, Ling L,  
689 Miller L, Gyaltshen Y, Fontana E, Morjaria S, Gyurkocza B, Perales MA, Castro-  
690 Malaspina H, Tamari R, Ponce D, Koehne G, Barker J, Jakubowski A, Papadopoulos E,  
691 Dahi P, Sauter C, Shaffer B, Young JW, Peled J, Meagher RC, Jenq RR, van den Brink  
692 MRM, Giralta SA, Pamer EG, Xavier JB: Reconstitution of the gut microbiota of antibiotic-

693 treated patients by autologous fecal microbiota transplant. *Sci Transl Med* 2018, 10  
694 83. Bilinski J, Grzesiowski P, Sorensen N, Madry K, Muszynski J, Robak K, Wroblewska M,  
695 Dzieciatkowski T, Dulny G, Dwilewicz-Trojaczek J, Wiktor-Jedrzejczak W, Basak GW:  
696 Fecal microbiota transplantation in patients with blood disorders inhibits gut colonization  
697 with antibiotic-resistant bacteria: Results of a prospective, single-center study. *Clin Infect*  
698 *Dis* 2017, 65:364-370.  
699  
700

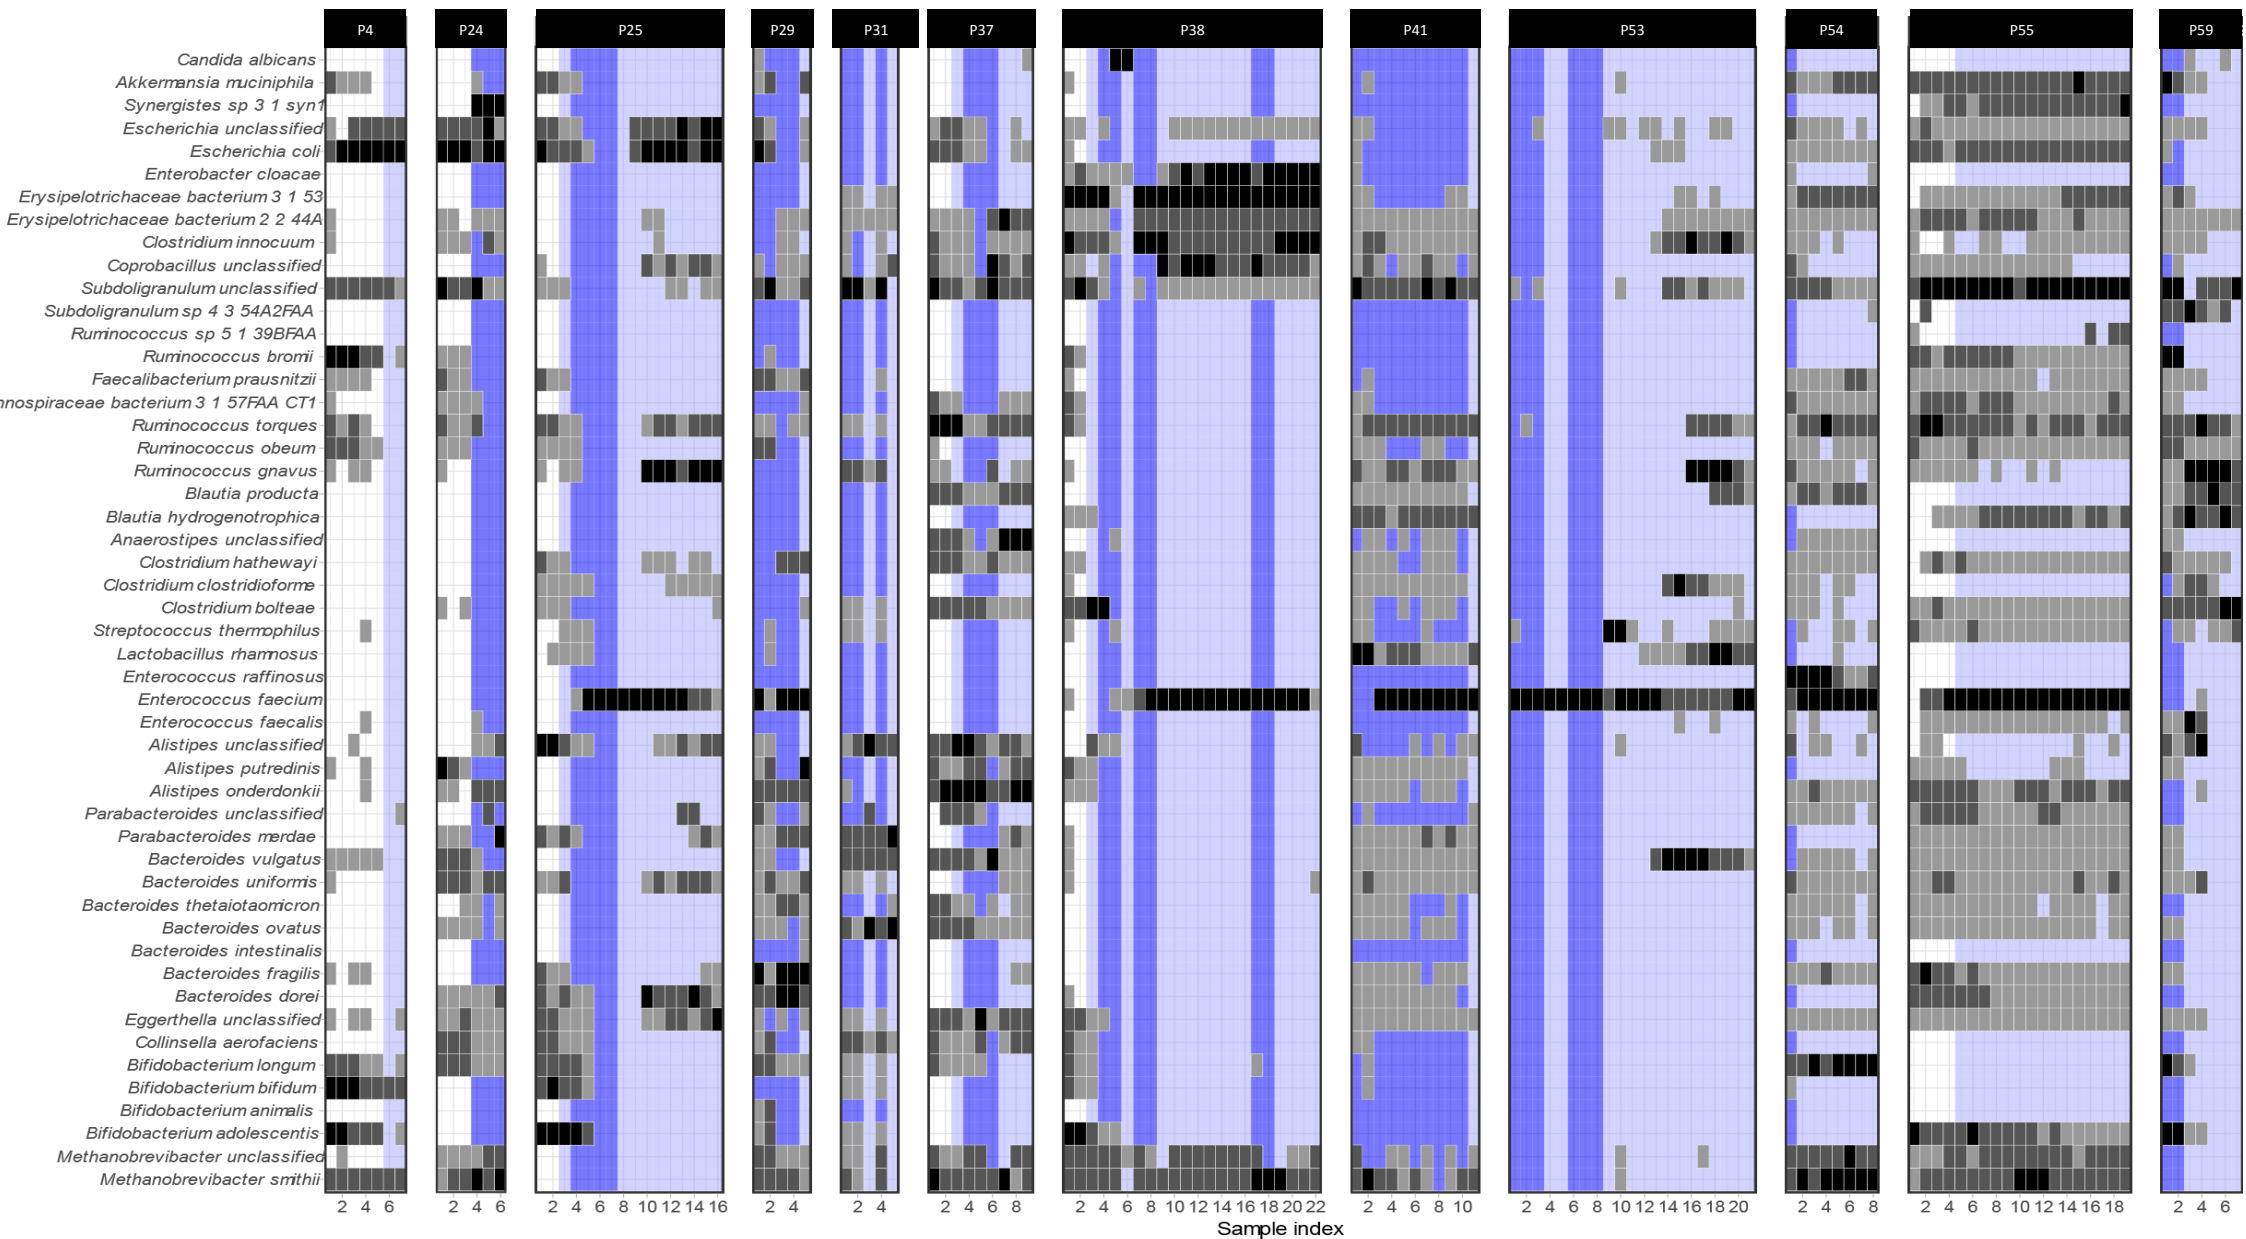

Patient 4

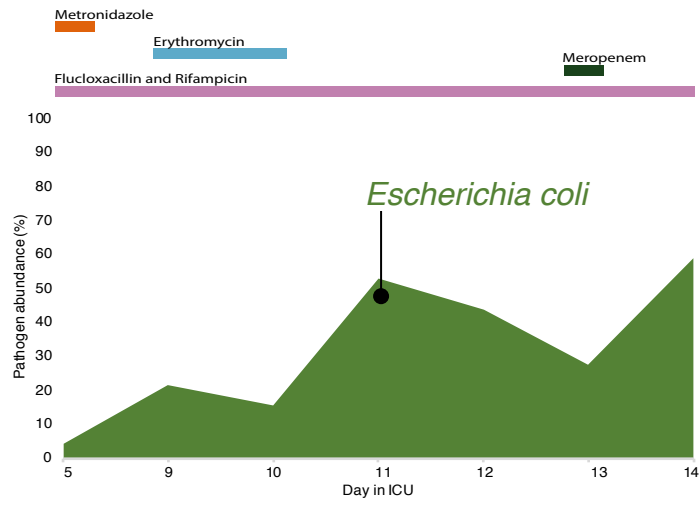

Patient 24

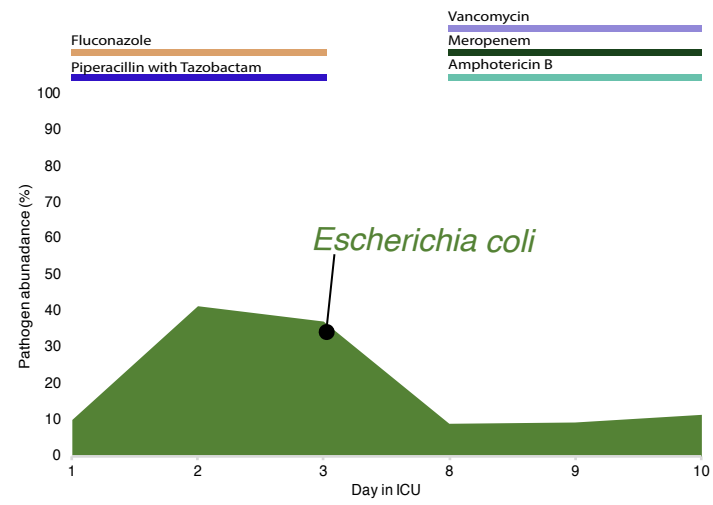

Patient 25

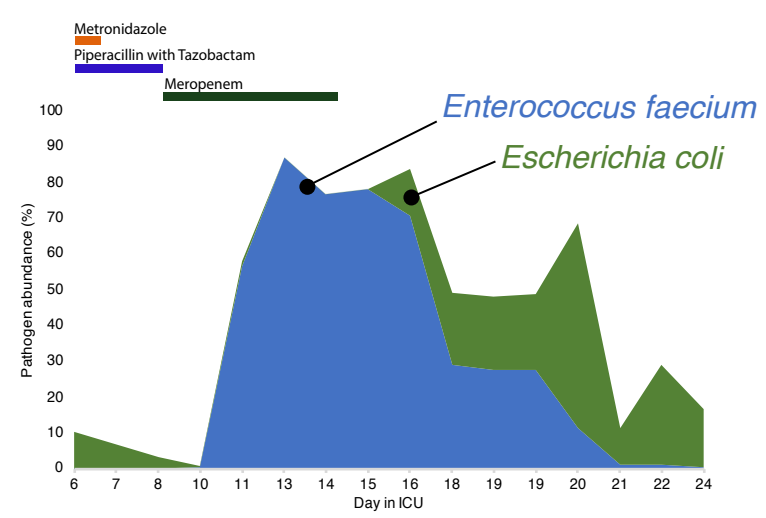

Patient 29

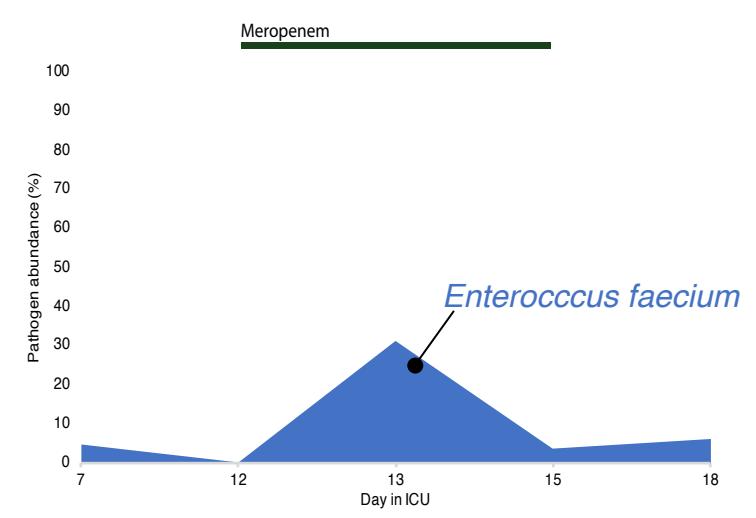

Patient 35

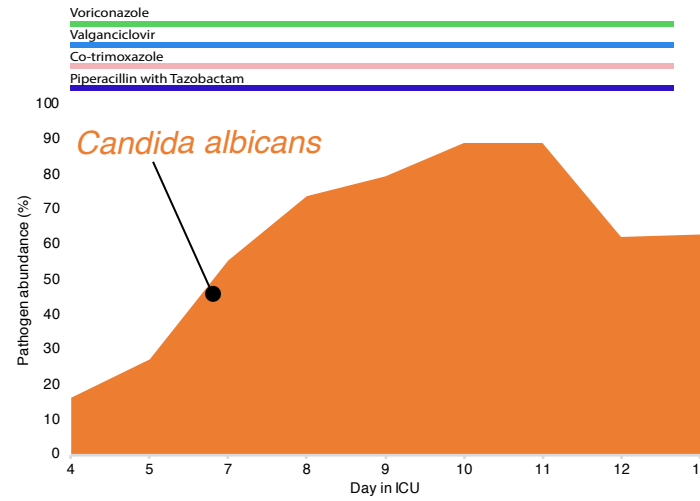

Patient 38

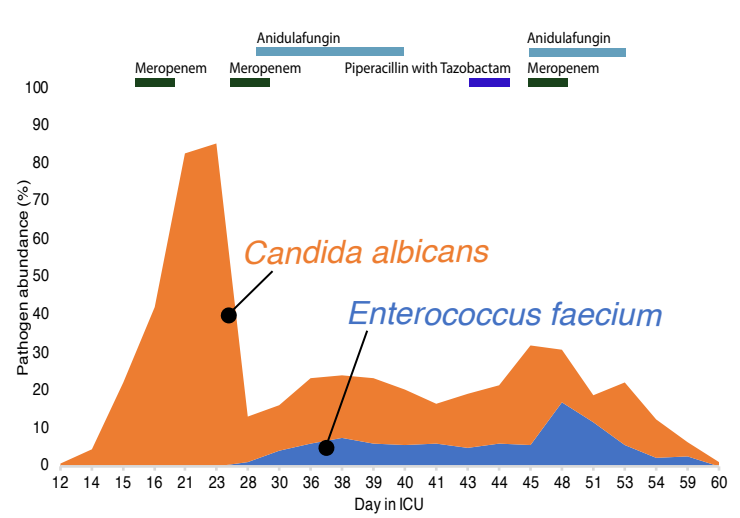

Patient 41

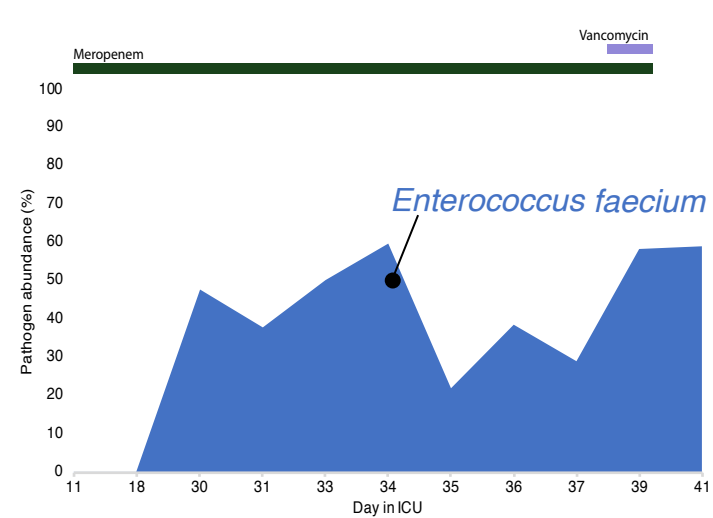

Patient 51

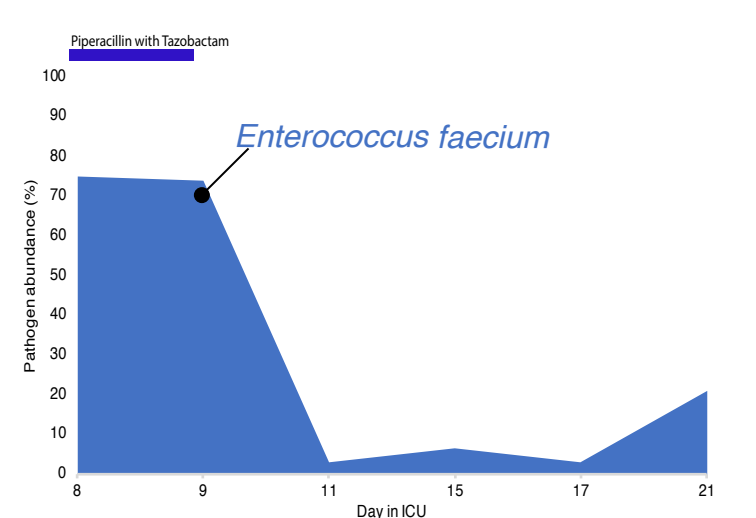

Patient 52

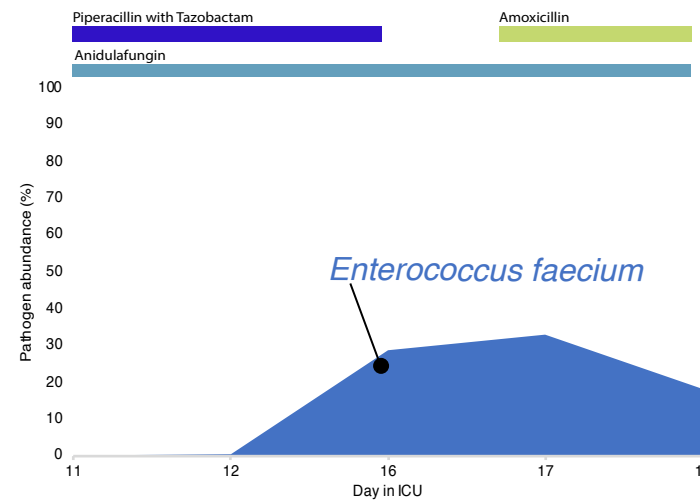

Patient 53

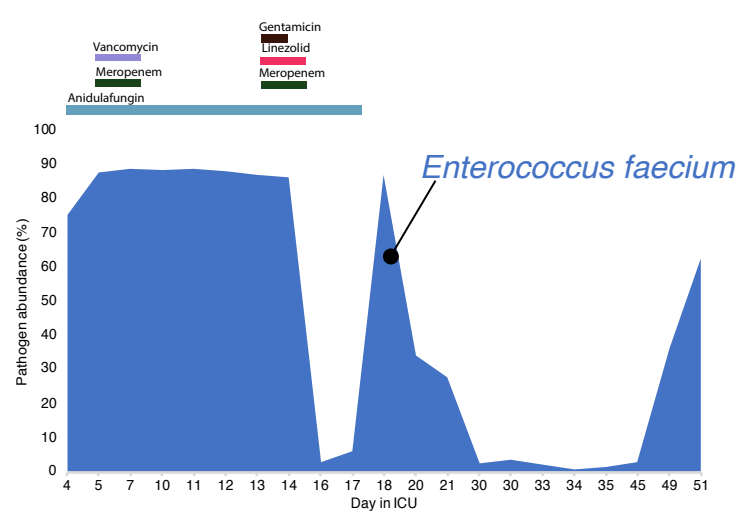

Patient 54

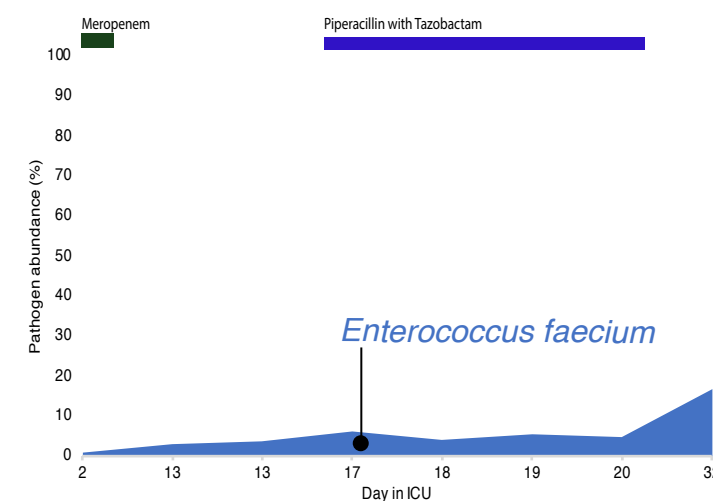

Patient 55

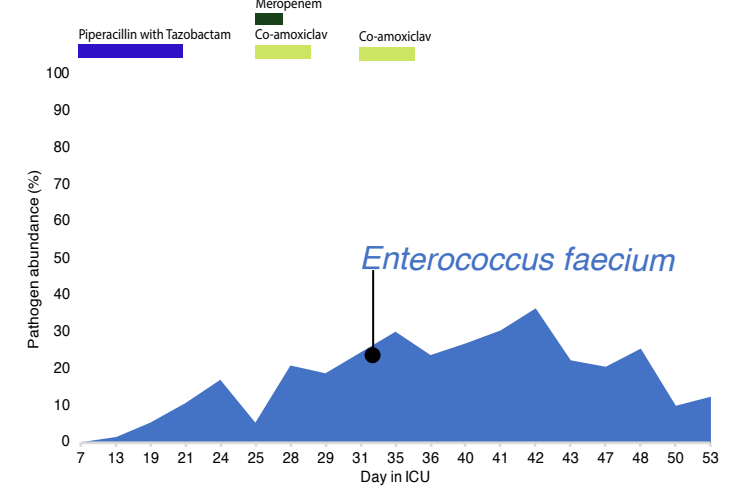

Source: https://www.biorxiv.org/content/10.1101/582494v1.full.pdf
